# Supplementary material
Source: PubMed Central journal article supplement (PMC2861326)
Supplement: sagmb1339_supplementary_0.pdf [file sagmb1339_supplementary_0.pdf]

## Supplementary Materials

Supplementary Figure 1. ROC curves for the posterior probability based on the proposed normalization and the two-sample t-test p-values following no or median normalizations. True array effects are non-randomized. Mean expression of under-expressed genes are -1 for the left panels and -3 for the right panels. From top to bottom,  $(\pi, \lambda)$  is (30%, 90%), (10%, 90%), and (30%, 60%).

Supplementary Figure 2. ROC curves for the posterior probability based on the proposed normalization and the two-sample t-test p-values following no or median normalizations. True array effects are non-randomized. For the left panels, data were simulated with gene effects  $\beta_g$  having a uniform distribution. For the right panels, data were simulated with measurement errors  $\epsilon_{igp}$  having a  $t(\text{df}=3)$  distribution. From top to bottom,  $(\pi, \lambda)$  is (30%, 90%), (10%, 90%), and (30%, 60%).

Supplementary Figure 3. ROC curves for the posterior probability based on the proposed normalization and the two-sample t-test p-values following no or median normalizations. True array effects are non-randomized. Measurement error is 1. Mean expression of under-expressed genes are -1 for the left panels and -2 for the right panels. From top to bottom,  $(\pi, \lambda)$  are (30%, 90%), (10%, 90%), and (30%, 60%).

Supplementary Figure 4. QQplot for the normal fat samples ( $n=12$ ), with the observed expression on the x axis and the predicted expression on the y axis. Data from a random set of 2228 probesets are plotted. The red line indicates the diagonal.

Supplementary Figure 5. QQplot for the MRC samples ( $n=8$ ), with the observed expression on the x axis and the predicted expression on the y axis. Data from a random set of 2228 probesets are plotted. The red line indicates the diagonal.

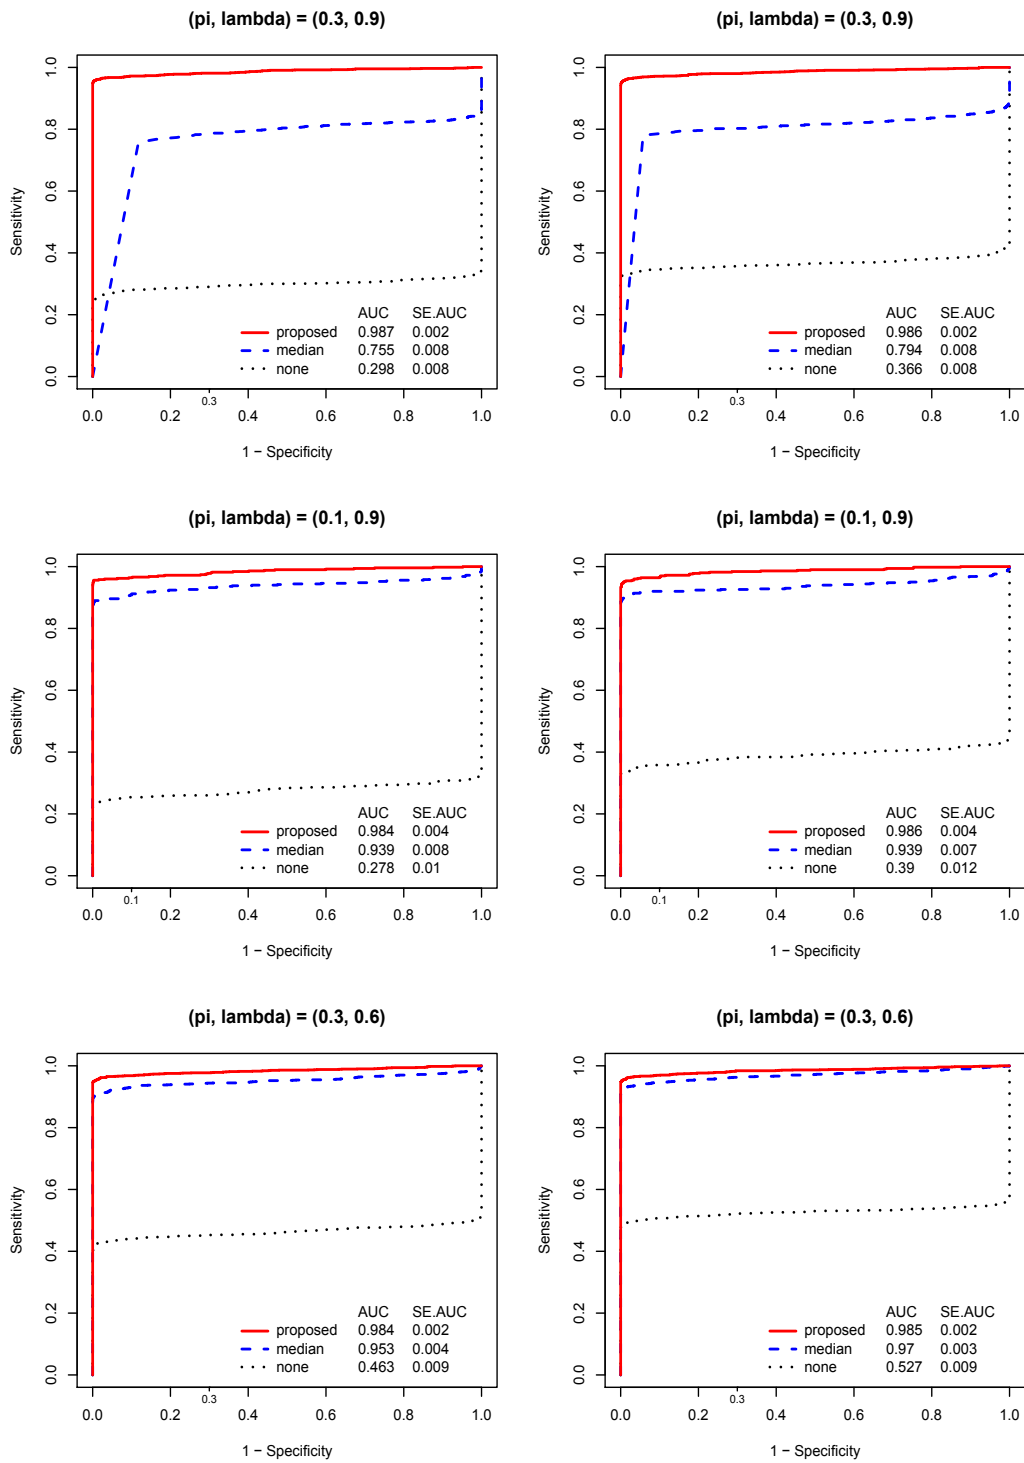

Figure 1:

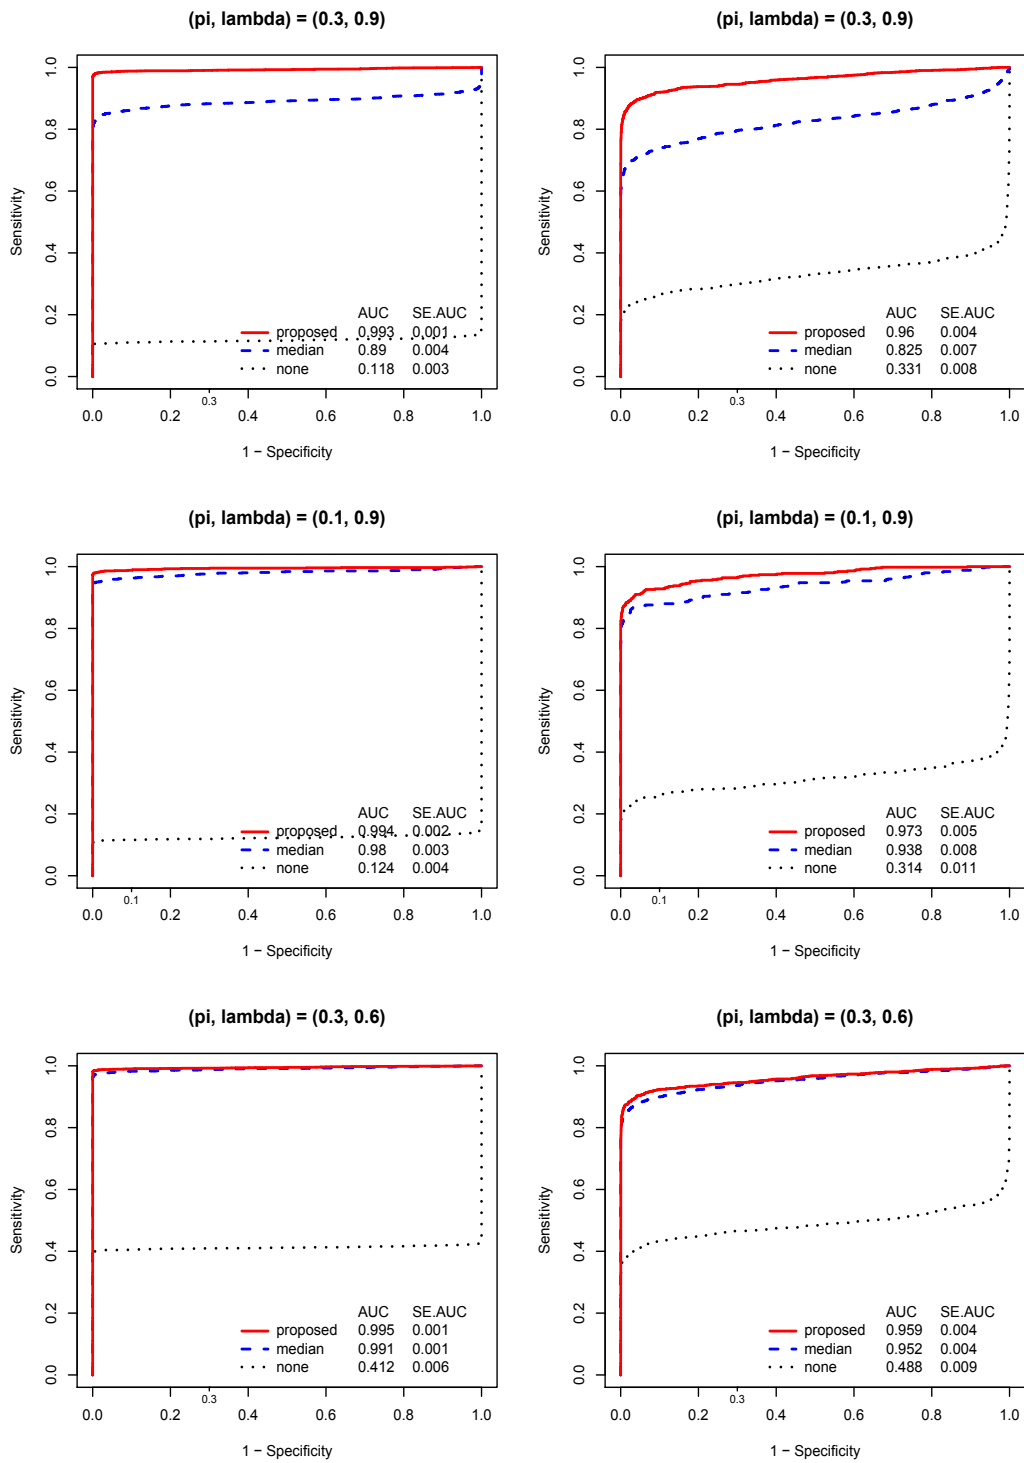

Figure 2:

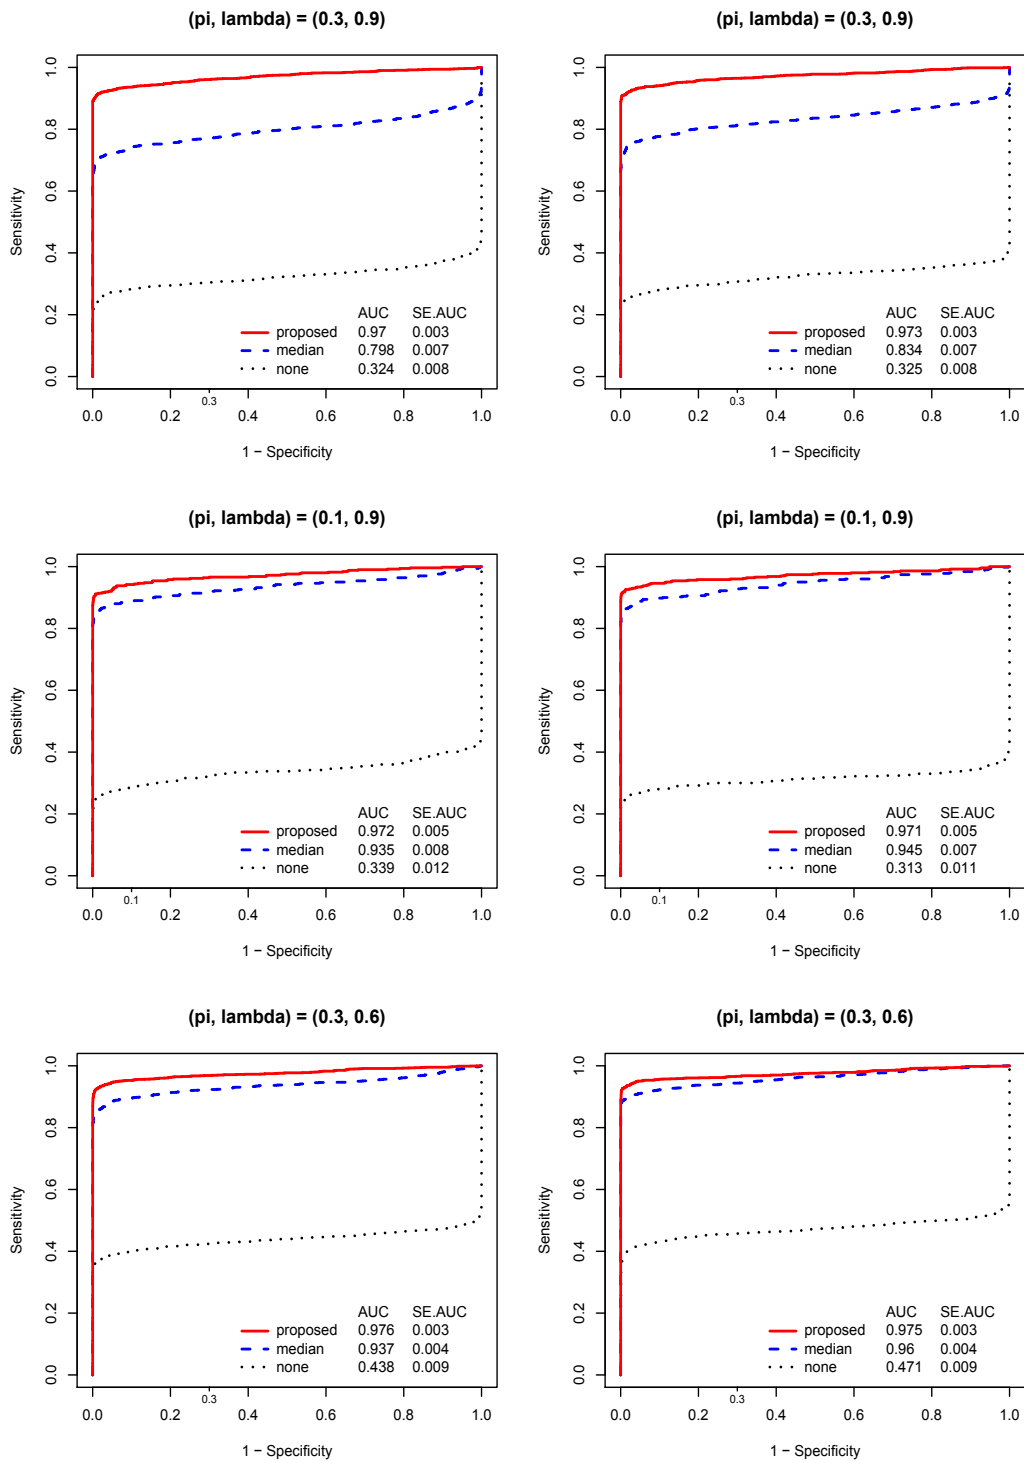

Figure 3:

### Normal Fat

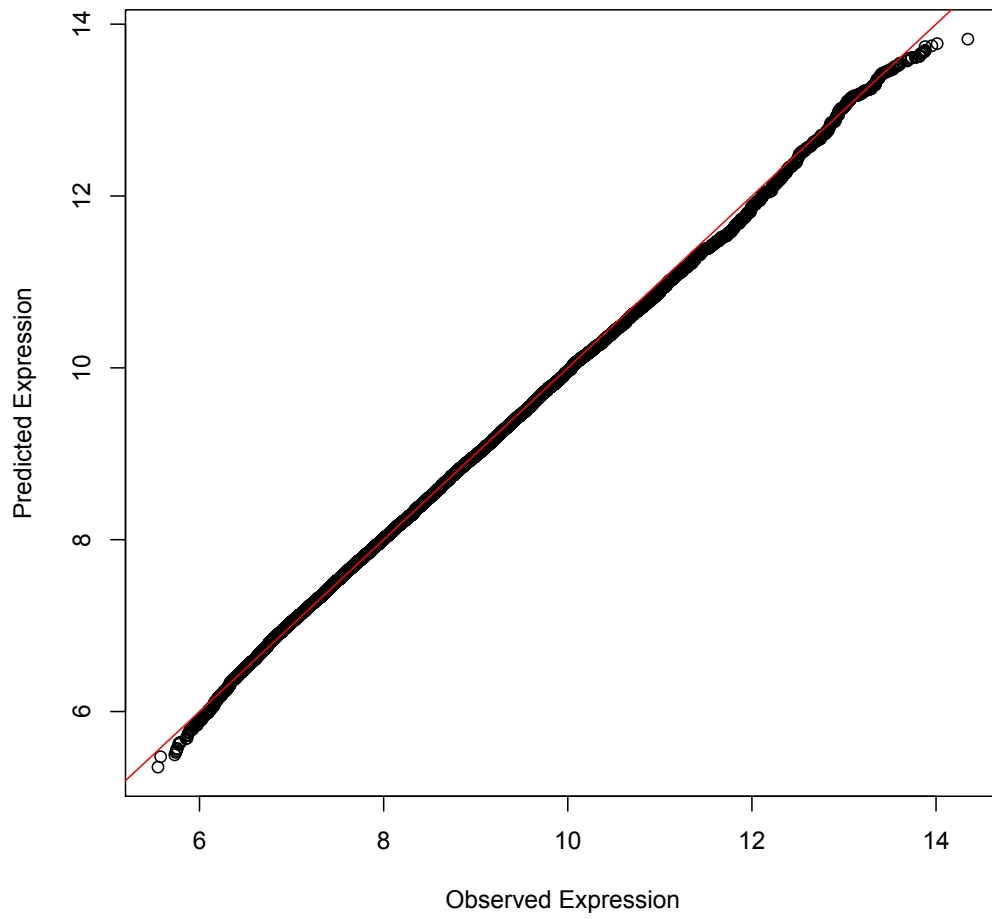

Figure 4:

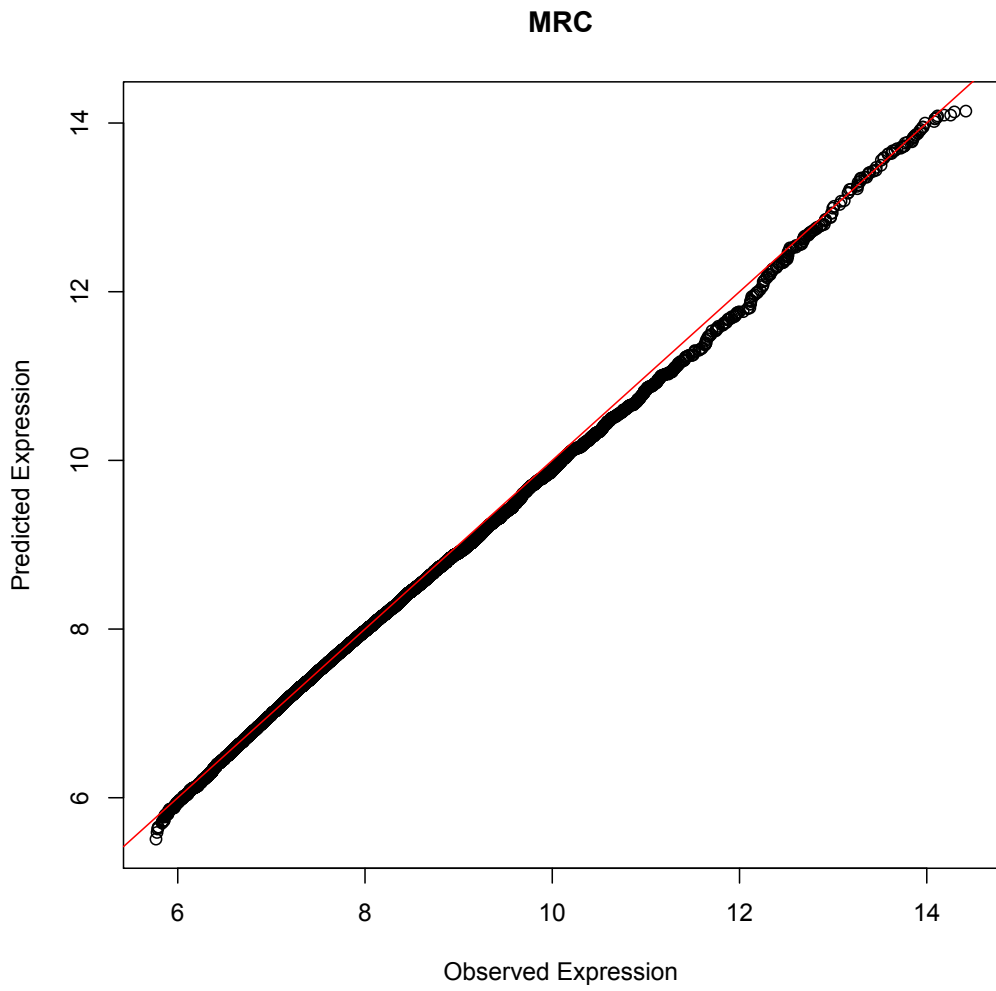

Figure 5:
